# Supplementary material
Source: ML conference proceedings conference paper supplement (https://proceedings.neurips.cc/paper_files/paper/2022/hash/2d52879ef2ba487445ca2e143b104c3b-Abstract.html)
Supplement: Supplementary file 1 [file 2d52879ef2ba487445ca2e143b104c3b-Supplemental-Conference.pdf]

| layer name           | layer depth | output size        | Small                                                              | Medium                                                             | Large                                                              | Extra large                                                        |
|----------------------|-------------|--------------------|--------------------------------------------------------------------|--------------------------------------------------------------------|--------------------------------------------------------------------|--------------------------------------------------------------------|
| Downsampling         | 1           | $W/2 \times H/2$   | $1 \times 1, 64$<br>$3 \times 3, 64$<br>stride 2<br>$\times 1$     | $1 \times 1, 64$<br>$3 \times 3, 64$<br>stride 2<br>$\times 1$     | $1 \times 1, 64$<br>$3 \times 3, 64$<br>stride 2<br>$\times 1$     | $1 \times 1, 64$<br>$3 \times 3, 64$<br>stride 2<br>$\times 1$     |
| Downsampling         | 2           | $W/4 \times H/4$   | $1 \times 1, 96$<br>$3 \times 3, 96$<br>stride 2<br>$\times 1$     | $1 \times 1, 128$<br>$3 \times 3, 128$<br>stride 2<br>$\times 1$   | $1 \times 1, 160$<br>$3 \times 3, 160$<br>stride 2<br>$\times 1$   | $1 \times 1, 200$<br>$3 \times 3, 200$<br>stride 2<br>$\times 1$   |
| Downsampling         | 3           | $W/8 \times H/8$   | $1 \times 1, 192$<br>$3 \times 3, 192$<br>stride 2<br>$\times 1$   | $1 \times 1, 256$<br>$3 \times 3, 256$<br>stride 2<br>$\times 1$   | $1 \times 1, 320$<br>$3 \times 3, 320$<br>stride 2<br>$\times 1$   | $1 \times 1, 400$<br>$3 \times 3, 400$<br>stride 2<br>$\times 1$   |
| Downsampling         | 4           | $W/16 \times H/16$ | $1 \times 1, 384$<br>$3 \times 3, 384$<br>stride 2<br>$\times 1$   | $1 \times 1, 512$<br>$3 \times 3, 512$<br>stride 2<br>$\times 1$   | $1 \times 1, 640$<br>$3 \times 3, 640$<br>stride 2<br>$\times 1$   | $1 \times 1, 800$<br>$3 \times 3, 800$<br>stride 2<br>$\times 1$   |
| Stream1              | 3-6         | $W/4 \times H/4$   | $1 \times 1, 96$<br>$3 \times 3, 96$<br>SSE<br>$\times 4$          | $1 \times 1, 128$<br>$3 \times 3, 128$<br>SSE<br>$\times 4$        | $1 \times 1, 160$<br>$3 \times 3, 160$<br>SSE<br>$\times 4$        | $1 \times 1, 200$<br>$3 \times 3, 200$<br>SSE<br>$\times 4$        |
| Stream1-Downsampling | 8           | $W/8 \times H/8$   | $1 \times 1, 192$<br>$3 \times 3, 192$<br>stride 2<br>$\times 1$   | $1 \times 1, 256$<br>$3 \times 3, 256$<br>stride 2<br>$\times 1$   | $1 \times 1, 320$<br>$3 \times 3, 320$<br>stride 2<br>$\times 1$   | $1 \times 1, 400$<br>$3 \times 3, 400$<br>stride 2<br>$\times 1$   |
| Stream2              | 4-8         | $W/8 \times H/8$   | $1 \times 1, 192$<br>$3 \times 3, 192$<br>SSE<br>$\times 5$        | $1 \times 1, 256$<br>$3 \times 3, 256$<br>SSE<br>$\times 5$        | $1 \times 1, 320$<br>$3 \times 3, 320$<br>SSE<br>$\times 5$        | $1 \times 1, 400$<br>$3 \times 3, 400$<br>SSE<br>$\times 5$        |
| Stream2-Fusion       | 9           | $W/16 \times H/16$ | $1 \times 1, 384$<br>$3 \times 3, 384$<br>stride 2<br>$\times 1$   | $1 \times 1, 512$<br>$3 \times 3, 512$<br>stride 2<br>$\times 1$   | $1 \times 1, 640$<br>$3 \times 3, 640$<br>stride 2<br>$\times 1$   | $1 \times 1, 800$<br>$3 \times 3, 800$<br>stride 2<br>$\times 1$   |
| Stream3              | 5-9         | $W/16 \times H/16$ | $1 \times 1, 384$<br>$3 \times 3, 384$<br>SSE<br>$\times 5$        | $1 \times 1, 512$<br>$3 \times 3, 512$<br>SSE<br>$\times 5$        | $1 \times 1, 640$<br>$3 \times 3, 640$<br>SSE<br>$\times 5$        | $1 \times 1, 800$<br>$3 \times 3, 800$<br>SSE<br>$\times 5$        |
| Stream3-Fusion       | 10          | $W/16 \times H/16$ | $1 \times 1, 384$<br>$3 \times 3, 384$<br>SSE<br>$\times 1$        | $1 \times 1, 512$<br>$3 \times 3, 512$<br>SSE<br>$\times 1$        | $1 \times 1, 640$<br>$3 \times 3, 640$<br>SSE<br>$\times 1$        | $1 \times 1, 800$<br>$3 \times 3, 800$<br>SSE<br>$\times 1$        |
| Downsampling         | 11          | $W/32 \times H/32$ | $1 \times 1, 1280$<br>$3 \times 3, 1280$<br>stride 2<br>$\times 1$ | $1 \times 1, 2048$<br>$3 \times 3, 2048$<br>stride 2<br>$\times 1$ | $1 \times 1, 2560$<br>$3 \times 3, 2560$<br>stride 2<br>$\times 1$ | $1 \times 1, 3200$<br>$3 \times 3, 3200$<br>stride 2<br>$\times 1$ |
| Final                | 12          | $1 \times 1$       | average pool, 1000-d fc, softmax                                   |                                                                    |                                                                    |                                                                    |

Table A1: Specification of ParNet models used for ImageNet classification: ParNet-S, ParNet-M, ParNet-L, and ParNet-XL.

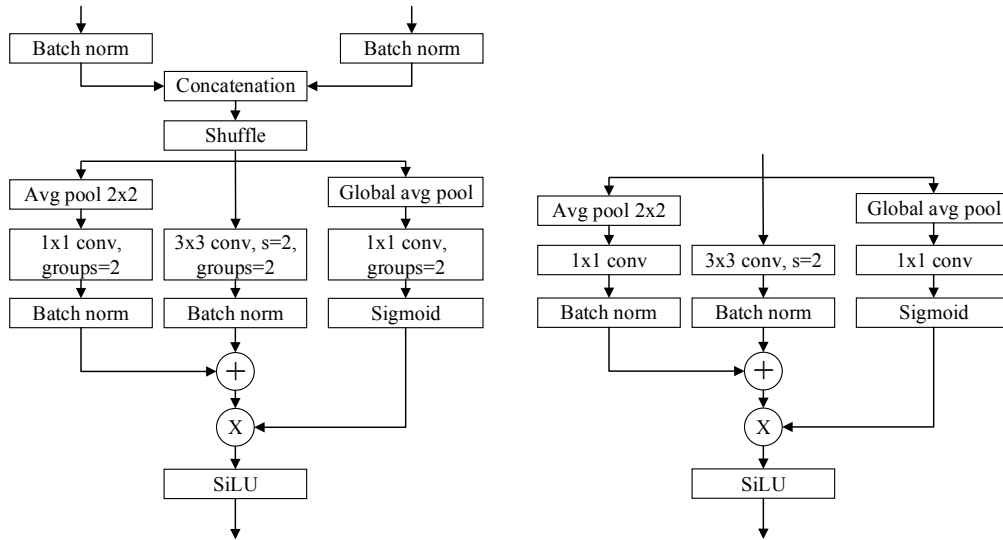

Figure A1: Schematic representation of the Fusion (left) and Downsampling (right) blocks used in ParNet.
